# Supplementary material
Source: publisher figshare collection journal article supplement (https://acs.figshare.com/ndownloader/files/22616165)
Supplement: Supplementary file 1 [file 22616165]

# Supporting information

## Virus-Inspired Mimics: Dual-pH-Responsive Modular Nanoplatforms for Programmable Gene Delivery without DNA Damage with the Assistance of Light

Jie Zhou,<sup>†</sup> Shengnan Ma,<sup>+</sup> Yuxin Zhang,<sup>†</sup> Yiyan He,<sup>\*,‡</sup> Jun Yang,<sup>§</sup> Hu Zhang,<sup>||</sup> Kui Luo,<sup>†</sup> and Zhongwei Gu<sup>\*,†,‡</sup>

<sup>†</sup>Huaxi MR Research Center (HMRRC), Department of Radiology, Functional and Molecular Imaging Key Laboratory of Sichuan Province, West China Hospital, Sichuan University, Chengdu 610041, P. R. China

<sup>+</sup>National Engineering Research Center for Biomaterials, Sichuan University, Chengdu 610041, P. R. China

<sup>‡</sup>College of Materials Science and Engineering, Nanjing Tech University, 30 South Puzhu Road, Nanjing 211816, P. R. China

<sup>§</sup>The Key Laboratory of Bioactive Materials, Ministry of Education, College of Life Science, Nankai University, Tianjin 300071, P. R. China

<sup>||</sup>Amgen Bioprocessing Centre, Keck Graduate Institute, Claremont, CA 91711, USA

**\*Corresponding Author**

\*E-mail: zwgu1006@hotmail.com, zwgu@njtech.edu.cn (Z.G.).

\*E-mail: yiyanhe@njtech.edu.cn (Y.H.).

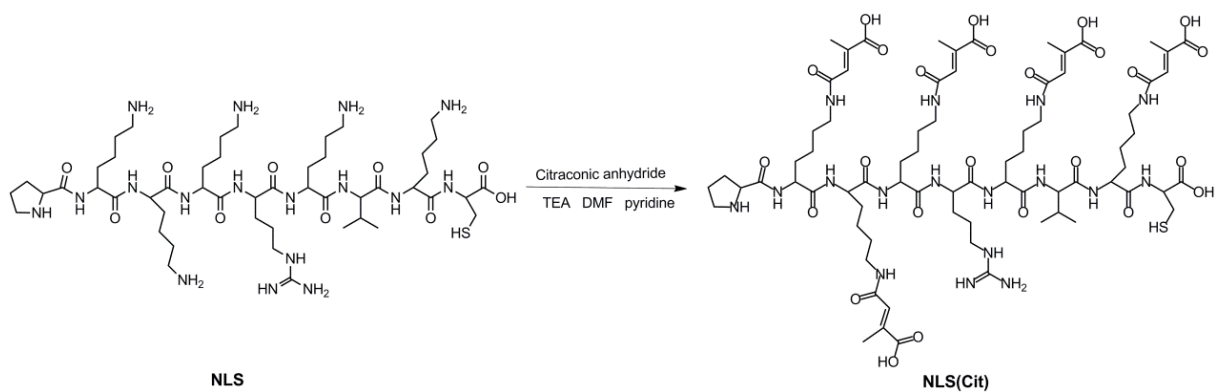

**Figure S1.** Synthesis routine for NLS(Cit).

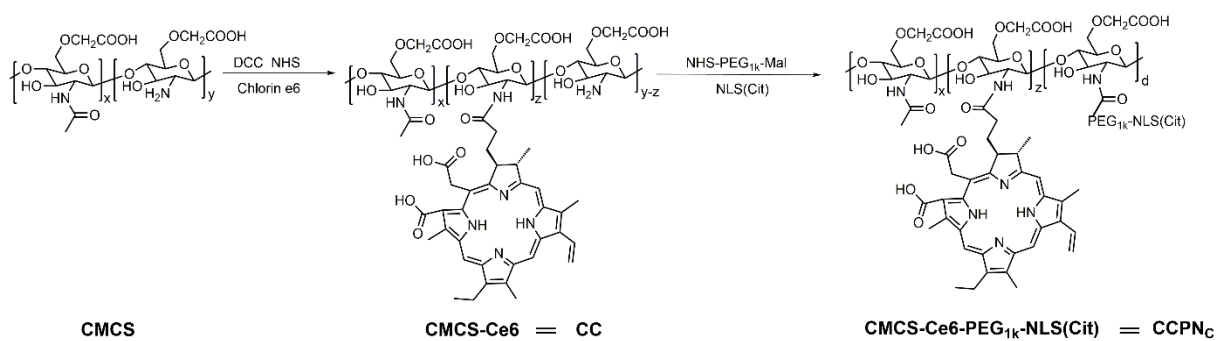

**Figure S2.** Synthetic routine for CMCS-Ce6-PEG<sub>1k</sub>-NLS(Cit) (CCPN<sub>c</sub>).

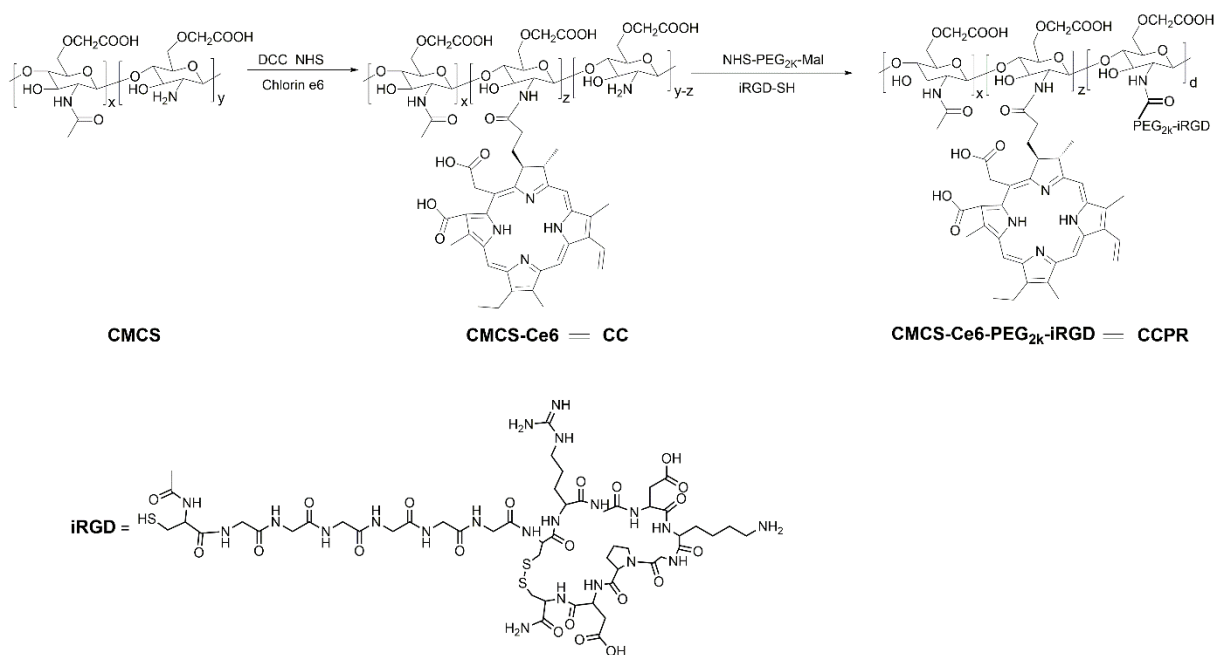

**Figure S3.** Synthetic routine for CMCS-Ce6-PEG<sub>2k</sub>-iRGD (CCPR).

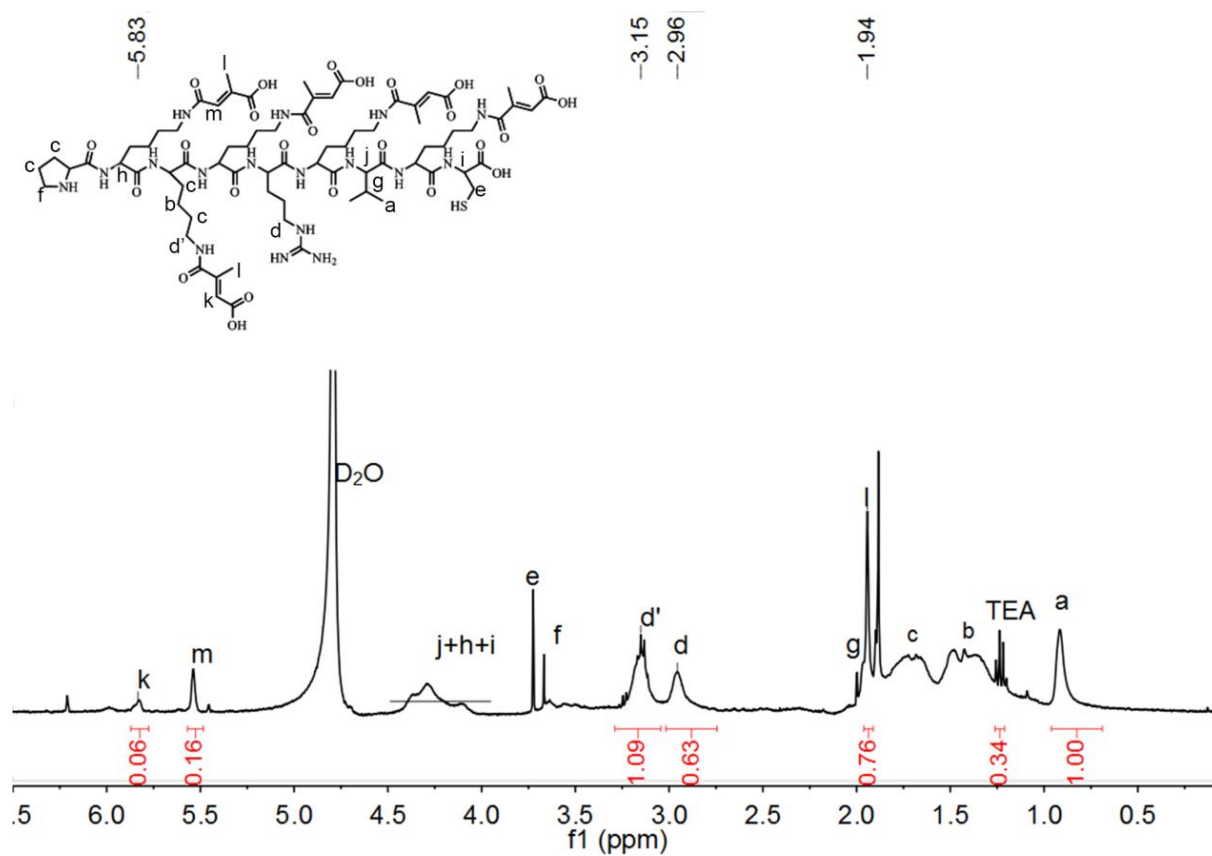

**Figure S4.**  $^1\text{H}$  NMR spectrum for NLS(Cit) in  $\text{D}_2\text{O}$ .

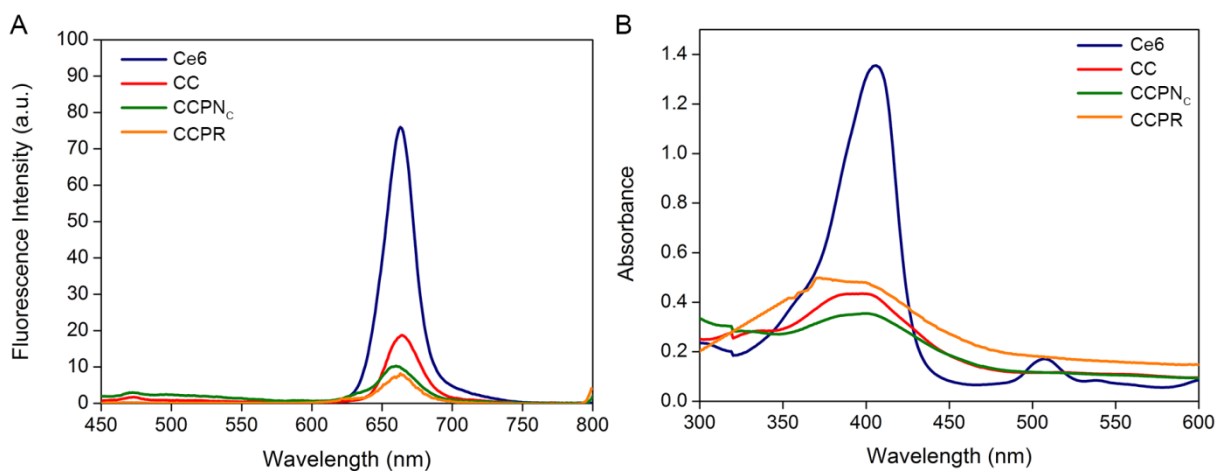

**Figure S5.** (A) Fluorescence spectra and (B) UV-vis absorption spectra of different polymers in the PBS buffer at pH 7.4 (Ce6 0.01 mg/mL, CC 0.15 mg/mL, CCPN<sub>c</sub>, and CCPR 1 mg/mL). The excitation wavelength of fluorescence emission spectra was fixed at 405 nm.

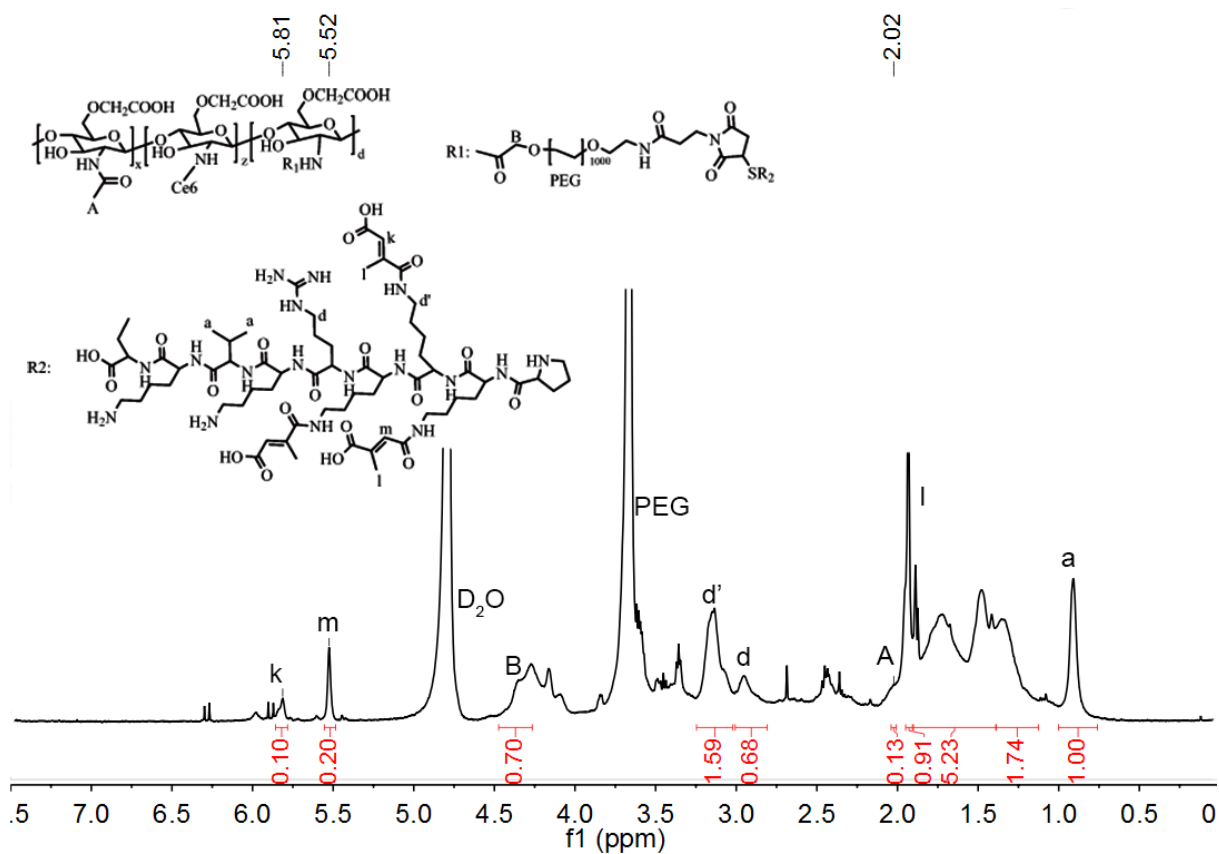

**Figure S6.**  $^1\text{H}$  NMR spectrum for CCPN<sub>C</sub> in  $\text{D}_2\text{O}$ .

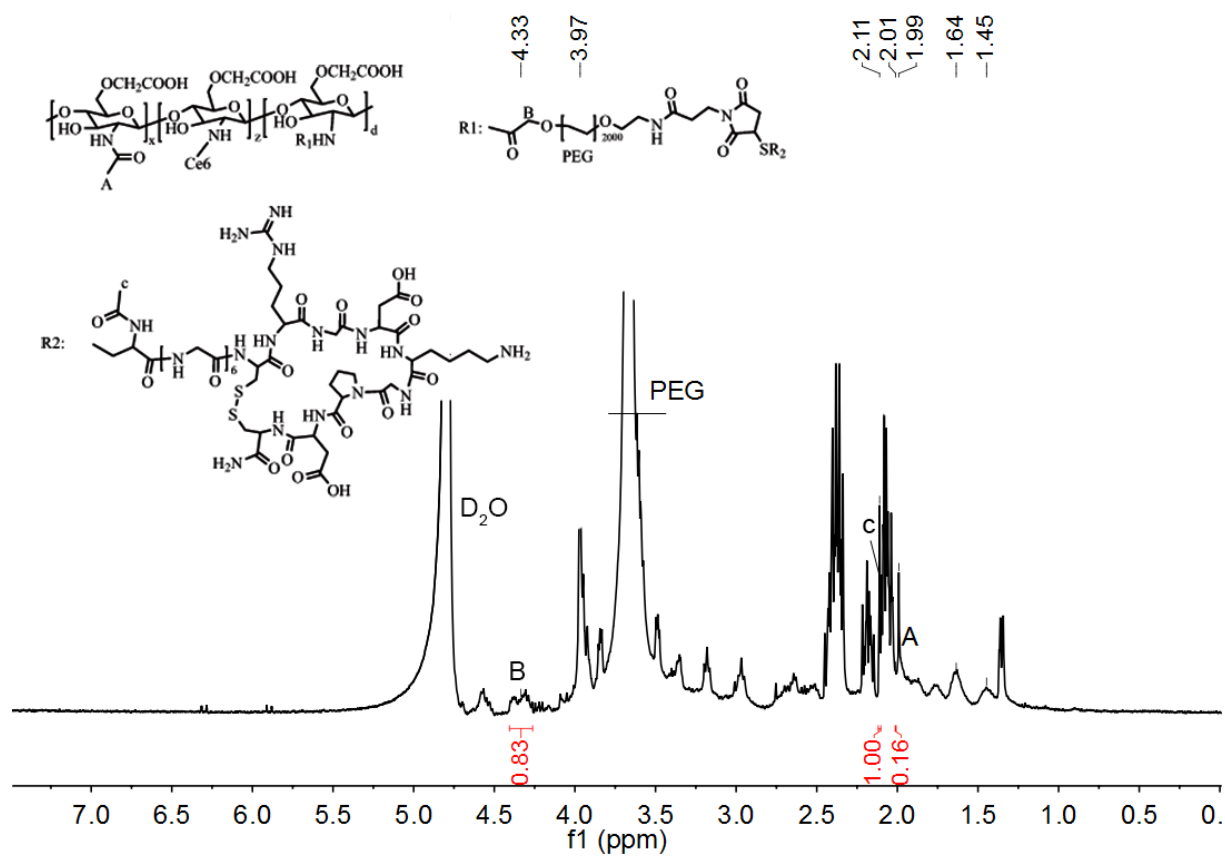

**Figure S7.**  $^1\text{H}$  NMR spectrum for CCPR in  $\text{D}_2\text{O}$ .

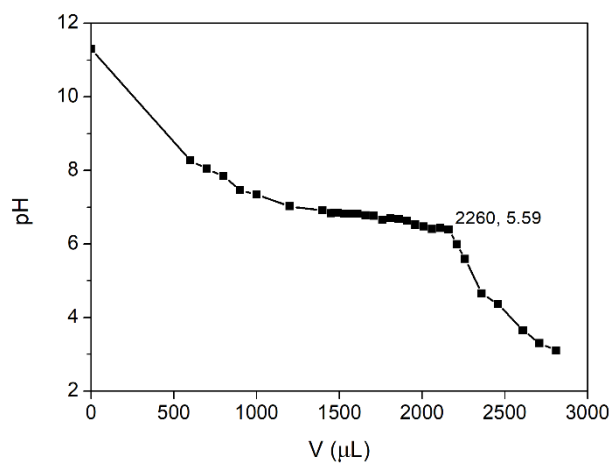

**Figure S8.** Isoelectric point of CMCS determined by acid-base titration.

**Table S1.** Size and zeta potential of different polyplexes prepared at a weight ratio of PEI/DNA/envelope (1.33/1/5) recorded using dynamic light scattering (DLS).

| Sample name                     | Abbreviation         | Size (nm)         | Zeta potential (mV) |
|---------------------------------|----------------------|-------------------|---------------------|
| PEI/DNA                         | PD                   | $119.7 \pm 3.5$   | $14.0 \pm 0.1$      |
| PEI/DNA/CCPN <sub>C</sub>       | PD@CCPN <sub>C</sub> | $2146.3 \pm 71.5$ | $-3.0 \pm 0.8$      |
| PEI/DNA/CCPN <sub>C</sub> -CCPR | PD@CCPNR             | $211.3 \pm 12.3$  | $3.4 \pm 0.4$       |



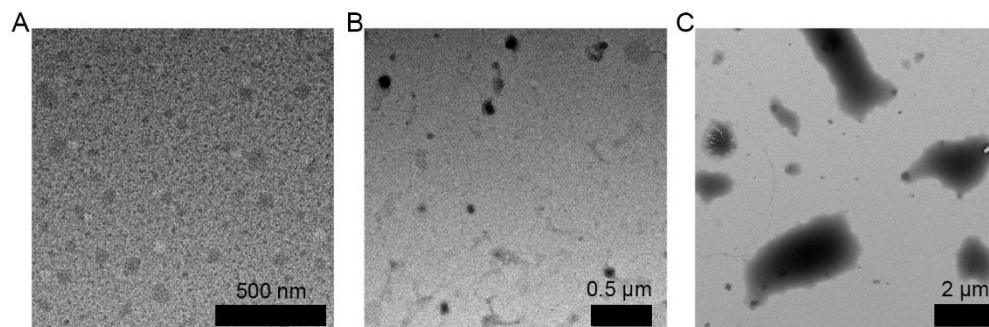

**Figure S9.** The morphology of (A) PD polyplexes, (B) PD@CCPNR at pH 7.4 and (C) PD@CCPNR at pH 5.0.

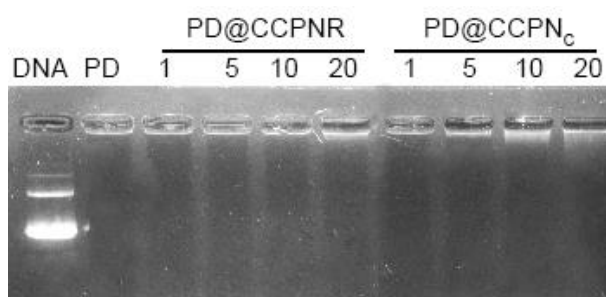

**Figure S10.** The effect of different envelopes on the stability of PD@CCPNR and PD@CCPN<sub>c</sub> prepared at different weight ratios (envelope/DNA in PD).

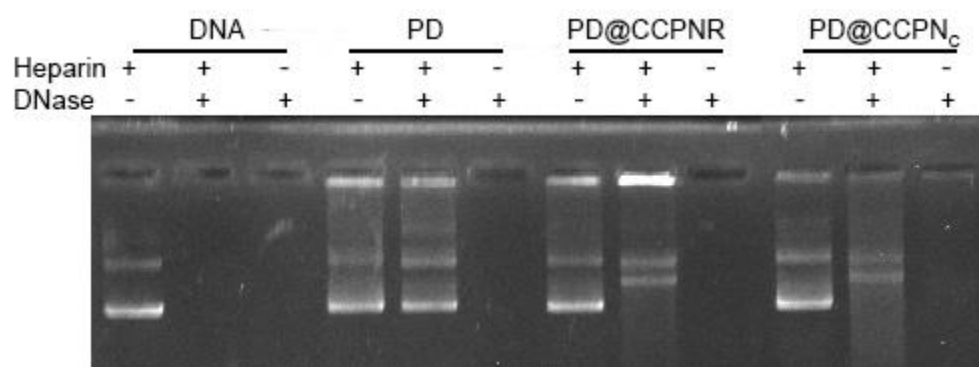

**Figure S11.** Stability of polyplexes followed by incubation with DNase I and/or heparin analyzed by agarose gel electrophoresis.

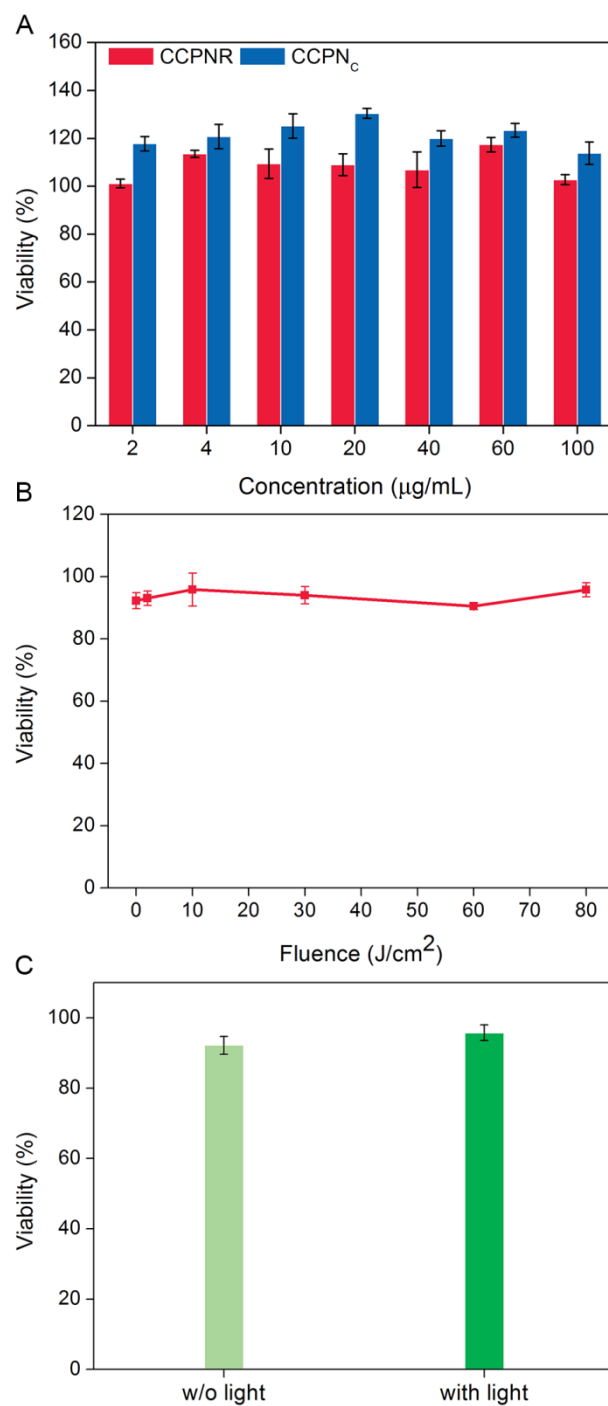

**Figure S12.** (A) Cell viability of B16 cells after an exposure to envelops at different concentrations. (B) The effect of light fluences on the photocytotoxicity of PD@CCPNR against B16 cells. The light irradiation was performed after incubation with PD@CCPNR for 4 h,

followed by 48 h of incubation in a fresh medium. (C) Viability of B16 cells transfected with PD@CCPNR in the presence or absence of light.

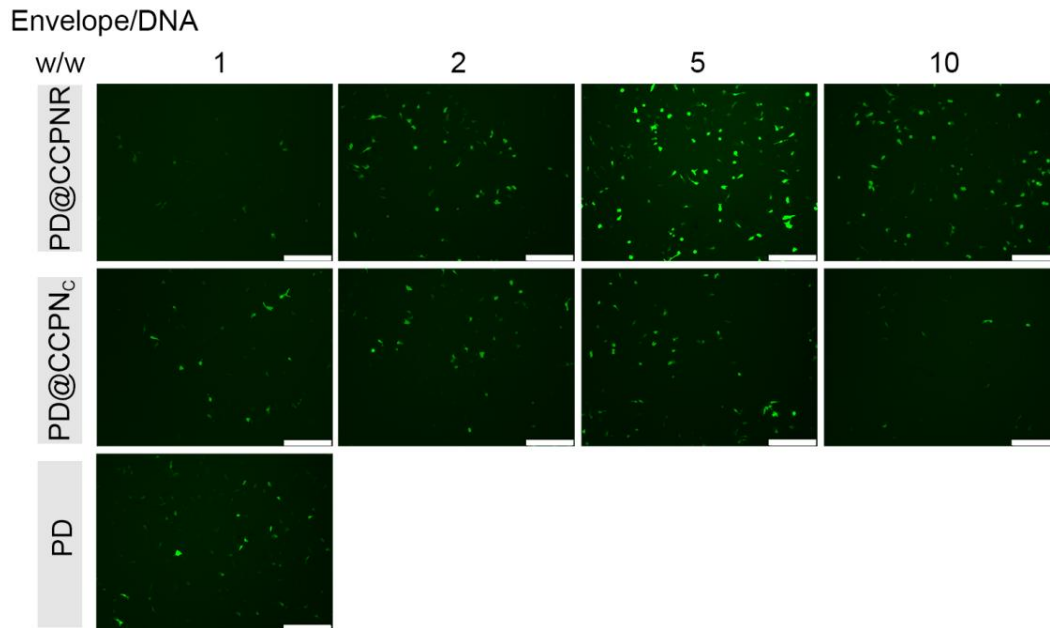

**Figure S13.** The enhanced green fluorescent protein (EGFP) expression of PD@CCPNR, PD@CCPN<sub>c</sub> and PD at various envelope/DNA weight ratios against B16 cells in the presence of serum. All the scale bars are 250  $\mu$ m.

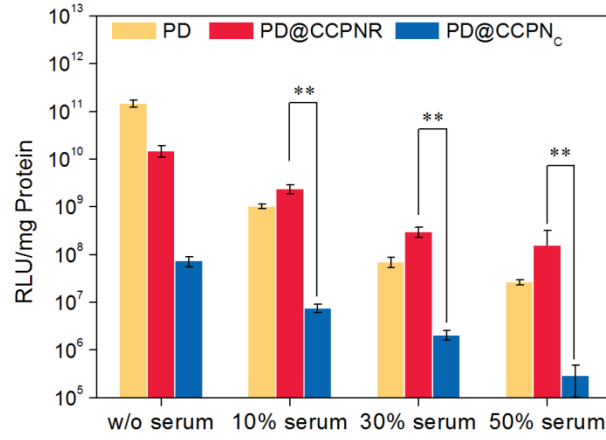

**Figure S14.** Luciferase expression of PD, PD@CCPNR and PD@CCPN<sub>c</sub> against B16 cells in the presence of serum at different concentrations (\*\* $p < 0.01$ ).

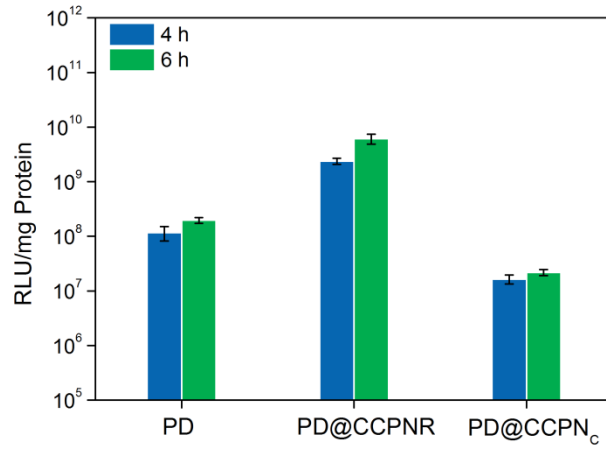

**Figure S15.** Luciferase activities against B16 cells transfected with PD, PD@CCPNR and PD@CCPN<sub>c</sub> for two incubation durations.

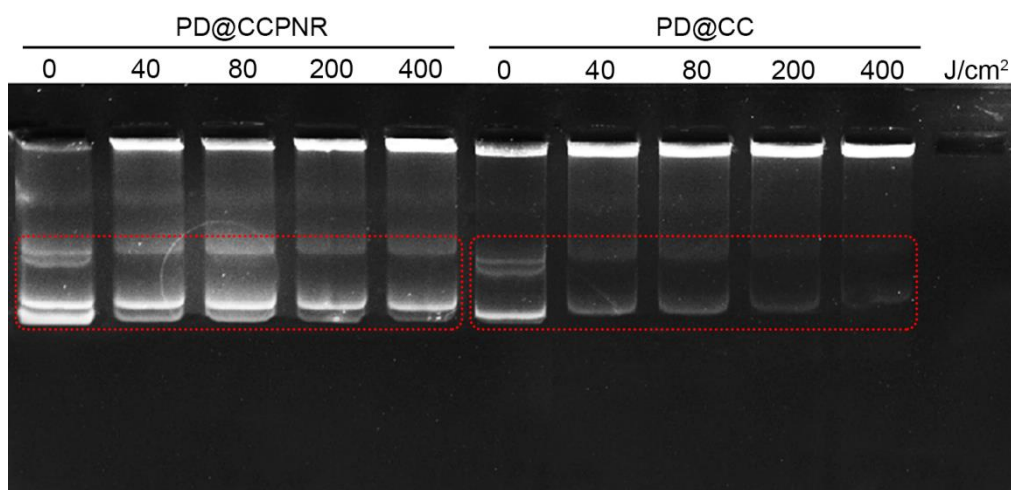

**Figure S16.** Agarose gel electrophoresis of pDNA released from PD@CCPNR and PD@CC which were both treated by light irradiation at different light fluences (660 nm) and heparin. PD@CCPNR without photoirradiation and PD@CC were set as controls.

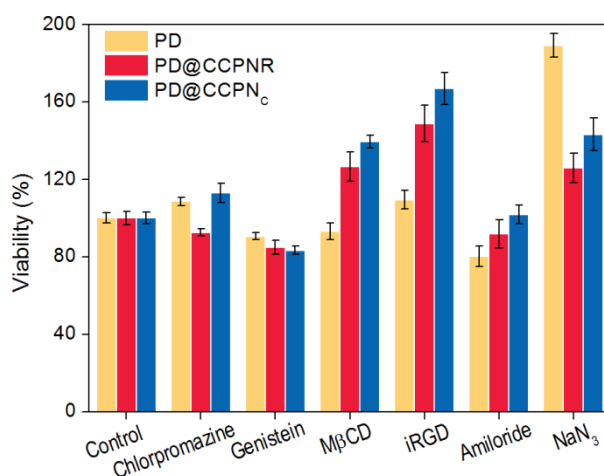

**Figure S17.** The effects of endocytic inhibitors on the cell viability of B16 cells determined by CCK-8 assay. Cells without any inhibitors treatment were used as a control.

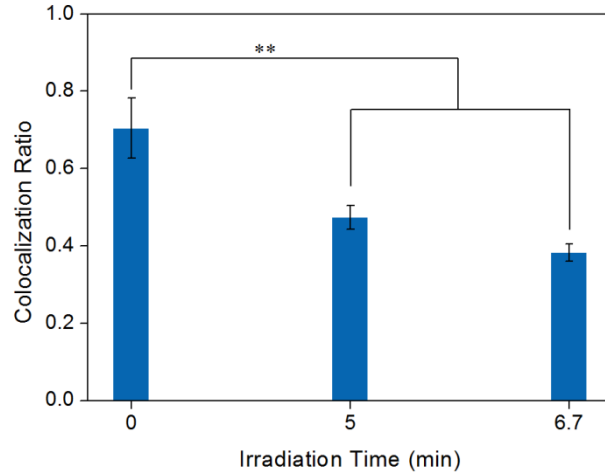

**Figure S18.** Colocalization ratio between the fluorescence of Cy3-labeled pDNA and endo/lysosomes stained by LysoTracker Green DND-26 as calculated from the confocal images in **Figure 6** (\*\* $p < 0.01$ ).

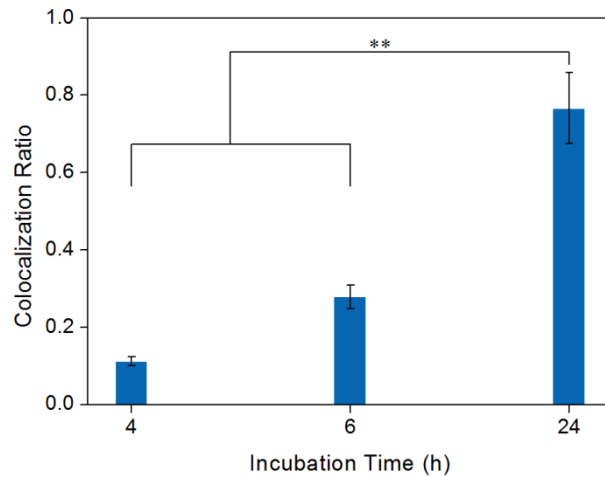

**Figure S19.** Colocalization ratio between the fluorescence of Hoechst 33342-labeled nuclei and Ce6 from CCPNR as calculated from the confocal images in **Figure 7** (\*\* $p < 0.01$ ).
